# Supplementary material for: Systematic Review of Pharmacogenetic Factors That Influence High-Dose Methotrexate Pharmacokinetics in Pediatric Malignancies
Source: MDPI journal article supplement (doi:10.3390/cancers13112837), 2021-06-07
Supplement: s1 [file s1]

**Supplement to:**

**Systematic Review of Pharmacogenetic Factors that Influence High-Dose Methotrexate Pharmacokinetics in Pediatric Malignancies**

**Zachary L. Taylor<sup>1,2,3</sup>, Jesper Vang<sup>4</sup>, Elixabet Lopez-Lopez<sup>5,6</sup>, Natanja Oosterom<sup>7</sup>, Torben Mikkelsen<sup>8</sup>, Laura B. Ramsey<sup>2,3,\*</sup>**

<sup>1</sup> Department of Pharmacology and Systems Physiology, University of Cincinnati, Cincinnati, OH, 45267, USA; taylorzl@mail.uc.edu

<sup>2</sup> Division of Research in Patient Services, Cincinnati Children's Hospital Medical Center, Cincinnati, OH, 45229, USA

<sup>3</sup> Division of Clinical Pharmacology, Cincinnati Children's Hospital Medical Center, Cincinnati, OH, 45229, USA

<sup>4</sup> Department of Health Technology, Technical University of Denmark, Lyngby 2800, Denmark; Paediatric Oncology Research Laboratory, University Hospital of Copenhagen, Rigshospitalet Blegdamsvej 9, 2100 Copenhagen, Denmark; jvan@dtu.dk

<sup>5</sup> Department of Genetics, Physical Anthropology and Animal Physiology, Faculty of Science and Technology, University of the Basque Country, UPV/EHU, Leioa, 48940, Spain; elixabet.lopez@ehu.eus

<sup>6</sup> Pediatric Oncology Group, BioCruces Bizkaia Health Research Institute, Barakaldo, 48903, Spain

<sup>7</sup> Princess Máxima Center for Pediatric Oncology, Utrecht, 3720, The Netherlands; n.oosterom@prinsesmaximacentrum.nl

<sup>8</sup> Department of Pediatric Oncology, Aarhus University Hospital, Aarhus, 8200, Denmark; torben.mikkelsen@clin.au.dk

\* Correspondence: laura.ramsey@cchmc.org; Tel.: +1-513-803-8963

**Supplementary Materials: Table S1:** Search query used by PubMed and Scopus for article identification.

| Database | Search Query                                                                                                                                                                                                                                                                                                                                                                                                                                                                                                                                                                                                                                                                                                                                                                                                                                                                                                                                                                                                                                                                                                                                                                                                                                                                                                                                                                                                                                                                                                                                                                                                                                                                                                                                                                                                                                                                                                                  | Number of Hits | Date of Search |
|----------|-------------------------------------------------------------------------------------------------------------------------------------------------------------------------------------------------------------------------------------------------------------------------------------------------------------------------------------------------------------------------------------------------------------------------------------------------------------------------------------------------------------------------------------------------------------------------------------------------------------------------------------------------------------------------------------------------------------------------------------------------------------------------------------------------------------------------------------------------------------------------------------------------------------------------------------------------------------------------------------------------------------------------------------------------------------------------------------------------------------------------------------------------------------------------------------------------------------------------------------------------------------------------------------------------------------------------------------------------------------------------------------------------------------------------------------------------------------------------------------------------------------------------------------------------------------------------------------------------------------------------------------------------------------------------------------------------------------------------------------------------------------------------------------------------------------------------------------------------------------------------------------------------------------------------------|----------------|----------------|
| PubMed   | ((("methotrexate"[MeSH Terms] OR "methotrexate"[Text Word]) NOT "review"[Publication Type]) AND "english"[Language] AND (((("enzym*"[Text Word] OR "enzymes"[MeSH Terms] OR "enzymes and coenzymes"[MeSH Terms] OR "transport*"[Text Word] OR "membrane transport proteins"[MeSH Terms] OR "gene*"[Text Word] OR "genes"[MeSH Terms] OR "renal*"[Text Word] OR "kidney*"[Text Word] OR "kidney"[MeSH Terms] OR "hepatic*"[Text Word] OR "liver"[Text Word] OR "liver"[MeSH Terms]) AND ("pharmacogen*"[Text Word] OR "pharmacogenetics"[MeSH Terms] OR "genetic variation"[MeSH Terms] OR "genetic*"[Text Word] OR "genetics, medical"[MeSH Terms] OR "genotype"[MeSH Terms] OR "mutation"[MeSH Terms] OR "mutation"[Text Word] OR "pharmacogenomic variants"[MeSH Terms] OR "polymorphism, genetic"[MeSH Terms] OR "polymorphism, single nucleotide"[MeSH Terms] OR "polymorphism*"[Text Word] OR "varia*"[Text Word])) NOT "review"[Publication Type]) AND "english"[Language]) AND (((("pharmacokinetic*"[Text Word] OR "pharmacokinetics"[MeSH Terms] OR "clearance"[Text Word] OR "elimination"[Text Word] OR "metabolic clearance rate"[MeSH Terms] OR "exposure"[Text Word] OR "area under curve"[MeSH Terms] OR "area under curve"[Text Word] OR "concentration*"[Text Word] OR "concentration-time"[Text Word] OR "plasma"[Text Word] OR "metabol*"[Text Word] OR "precision medicine"[Text Word] OR "precision medicine"[MeSH Terms] OR "modeling"[Text Word] OR "simulation"[Text Word] OR "personalized medicine"[Text Word]) NOT "review"[Publication Type]) AND "english"[Language]) AND (((("pediatric*"[Text Word] OR "pediatrics"[MeSH Terms] OR "child*"[Text Word] OR "child"[MeSH Terms] OR "adolesc*"[Text Word] OR "adolescent"[MeSH Terms] OR "paediatric*"[Text Word] OR "infant*"[Text Word] OR "infant"[MeSH Terms] OR "teen*"[Text Word]) NOT "review"[Publication Type]) AND "english"[Language]) | 437            | 11/16/2020     |

|        |                                                                                                                                                                                                                                                                                                                                                                                                                                                                                                                                                                                                                                                                                                                                                                                                                                                                                                                                                                                                                                                                                                                                                                                                                                                                                                                                                                                                                                                                                                                                                                                                                                                                                                                                                                                                                                                                                                                                      |     |            |
|--------|--------------------------------------------------------------------------------------------------------------------------------------------------------------------------------------------------------------------------------------------------------------------------------------------------------------------------------------------------------------------------------------------------------------------------------------------------------------------------------------------------------------------------------------------------------------------------------------------------------------------------------------------------------------------------------------------------------------------------------------------------------------------------------------------------------------------------------------------------------------------------------------------------------------------------------------------------------------------------------------------------------------------------------------------------------------------------------------------------------------------------------------------------------------------------------------------------------------------------------------------------------------------------------------------------------------------------------------------------------------------------------------------------------------------------------------------------------------------------------------------------------------------------------------------------------------------------------------------------------------------------------------------------------------------------------------------------------------------------------------------------------------------------------------------------------------------------------------------------------------------------------------------------------------------------------------|-----|------------|
| PubMed | <p>((("methotrexate"[MeSH Terms] OR "methotrexate"[Text Word]) NOT "review"[Publication Type]) AND "english"[Language] AND (((("enzym*"[Text Word] OR "enzymes"[MeSH Terms] OR "enzymes and coenzymes"[MeSH Terms] OR "transport*"[Text Word] OR "membrane transport proteins"[MeSH Terms] OR "gene*"[Text Word] OR "genes"[MeSH Terms] OR "renal*"[Text Word] OR "kidney*"[Text Word] OR "kidney"[MeSH Terms] OR "hepatic*"[Text Word] OR "liver"[Text Word] OR "liver"[MeSH Terms]) AND ("pharmacogen*"[Text Word] OR "pharmacogenetics"[MeSH Terms] OR "genetic variation"[MeSH Terms] OR "genetic*"[Text Word] OR "genetics, medical"[MeSH Terms] OR "genotype"[MeSH Terms] OR "mutation"[MeSH Terms] OR "mutation"[Text Word] OR "pharmacogenomic variants"[MeSH Terms] OR "polymorphism, genetic"[MeSH Terms] OR "polymorphism, single nucleotide"[MeSH Terms] OR "polymorphism*"[Text Word] OR "varia*"[Text Word])) NOT "review"[Publication Type]) AND "english"[Language]) AND (((("pharmacokinetic*"[Text Word] OR "pharmacokinetics"[MeSH Terms] OR "clearance"[Text Word] OR "elimination"[Text Word] OR "metabolic clearance rate"[MeSH Terms] OR "exposure"[Text Word] OR "area under curve"[MeSH Terms] OR "area under curve"[Text Word] OR "concentration*"[Text Word] OR "concentration-time"[Text Word] OR "plasma"[Text Word] OR "metabol*"[Text Word] OR "precision medicine"[Text Word] OR "precision medicine"[MeSH Terms] OR "modeling"[Text Word] OR "simulation"[Text Word] OR "personalized medicine"[Text Word]) NOT "review"[Publication Type]) AND "english"[Language]) AND (((("pediatric*"[Text Word] OR "pediatrics"[MeSH Terms] OR "child*"[Text Word] OR "child"[MeSH Terms] OR "adolesc*"[Text Word] OR "adolescent"[MeSH Terms] OR "paediatric*"[Text Word] OR "infant*"[Text Word] OR "infant"[MeSH Terms] OR "teen*"[Text Word]) NOT "review"[Publication Type]) AND "english"[Language])</p> | 443 | 2/26/2021  |
| Scopus | <p>((TITLE-ABS-KEY(methotrexate)) AND ((TITLE-ABS-KEY(enzym*) OR TITLE-ABS-KEY(transport*) OR TITLE-ABS-KEY(kidney*) OR TITLE-ABS-KEY(renal*) OR TITLE-ABS-KEY(liver) OR TITLE-ABS-KEY(hepatic*)) AND (TITLE-ABS-KEY(pharmacogen*) OR TITLE-ABS-KEY(polymorphism) OR TITLE-ABS-KEY(mutation) OR TITLE-ABS-KEY(varia*) OR TITLE-ABS-KEY(gene*) OR TITLE-ABS-KEY(geno*)))) AND (TITLE-ABS-KEY(clearance) OR TITLE-ABS-KEY(concentration) OR TITLE-ABS-KEY(elimination) OR TITLE-ABS-KEY(exposure) OR TITLE-ABS-KEY(metabo*) OR TITLE-ABS-KEY(pharmacokinetic*) OR TITLE-ABS-</p>                                                                                                                                                                                                                                                                                                                                                                                                                                                                                                                                                                                                                                                                                                                                                                                                                                                                                                                                                                                                                                                                                                                                                                                                                                                                                                                                                       | 486 | 11/16/2020 |

|        |                                                                                                                                                                                                                                                                                                                                                                                                                                                                                                                                                                                                                                                                                                                                                                                                                                                                                                                                                                                                                                       |     |           |
|--------|---------------------------------------------------------------------------------------------------------------------------------------------------------------------------------------------------------------------------------------------------------------------------------------------------------------------------------------------------------------------------------------------------------------------------------------------------------------------------------------------------------------------------------------------------------------------------------------------------------------------------------------------------------------------------------------------------------------------------------------------------------------------------------------------------------------------------------------------------------------------------------------------------------------------------------------------------------------------------------------------------------------------------------------|-----|-----------|
|        | KEY(modeling) OR TITLE-ABS-KEY(simulation) OR TITLE-ABS-KEY(parameter*)) AND (TITLE-ABS-KEY(pediatric*) OR TITLE-ABS-KEY(child*) OR TITLE-ABS-KEY(adolesc*) OR TITLE-ABS-KEY(paediatric*) OR TITLE-ABS-KEY(teen*) OR TITLE-ABS-KEY(infant*)) AND (TITLE-ABS-KEY(cancer) OR TITLE-ABS-KEY(leukemia) OR TITLE-ABS-KEY(lymphoma) OR TITLE-ABS-KEY(osteosarcoma) OR TITLE-ABS-KEY(oncology) OR TITLE-ABS-KEY(neoplasm*)) AND NOT DOCTYPE(re) AND LANGUAGE(english))                                                                                                                                                                                                                                                                                                                                                                                                                                                                                                                                                                       |     |           |
| Scopus | ((TITLE-ABS-KEY(methotrexate)) AND ((TITLE-ABS-KEY(enzym*) OR TITLE-ABS-KEY(transport*) OR TITLE-ABS-KEY(kidney*) OR TITLE-ABS-KEY(renal*) OR TITLE-ABS-KEY(liver) OR TITLE-ABS-KEY(hepatic*)) AND (TITLE-ABS-KEY(pharmacogen*) OR TITLE-ABS-KEY(polymorphism) OR TITLE-ABS-KEY(mutation) OR TITLE-ABS-KEY(varia*) OR TITLE-ABS-KEY(gene*) OR TITLE-ABS-KEY(geno*))) AND (TITLE-ABS-KEY(clearance) OR TITLE-ABS-KEY(concentration) OR TITLE-ABS-KEY(elimination) OR TITLE-ABS-KEY(exposure) OR TITLE-ABS-KEY(metabo*) OR TITLE-ABS-KEY(pharmacokinetic*) OR TITLE-ABS-KEY(modeling) OR TITLE-ABS-KEY(simulation) OR TITLE-ABS-KEY(parameter*)) AND (TITLE-ABS-KEY(pediatric*) OR TITLE-ABS-KEY(child*) OR TITLE-ABS-KEY(adolesc*) OR TITLE-ABS-KEY(paediatric*) OR TITLE-ABS-KEY(teen*) OR TITLE-ABS-KEY(infant*)) AND (TITLE-ABS-KEY(cancer) OR TITLE-ABS-KEY(leukemia) OR TITLE-ABS-KEY(lymphoma) OR TITLE-ABS-KEY(osteosarcoma) OR TITLE-ABS-KEY(oncology) OR TITLE-ABS-KEY(neoplasm*)) AND NOT DOCTYPE(re) AND LANGUAGE(english)) | 492 | 2/26/2021 |

**Table S2:** All available genes and polymorphisms included in the analysis for this systematic literature review.

| Gene Name    | Variants   | Significant Findings? | Does variant increase exposure? | References |
|--------------|------------|-----------------------|---------------------------------|------------|
| <i>ABCB1</i> | rs10244266 | No                    | NA                              | 29         |
| <i>ABCB1</i> | rs10246878 | No                    | NA                              | 29         |
| <i>ABCB1</i> | rs10260862 | No                    | NA                              | 29         |
| <i>ABCB1</i> | rs10264990 | No                    | NA                              | 22, 29     |
| <i>ABCB1</i> | rs10267099 | No                    | NA                              | 22         |
| <i>ABCB1</i> | rs10268314 | No                    | NA                              | 29         |
| <i>ABCB1</i> | rs10274587 | No                    | NA                              | 29         |
| <i>ABCB1</i> | rs10276036 | No                    | NA                              | 22         |
| <i>ABCB1</i> | rs10280101 | No                    | NA                              | 21, 22     |

|              |            |            |     |                                |
|--------------|------------|------------|-----|--------------------------------|
| <i>ABCB1</i> | rs1045642  | No         | Yes | 20, 25, 26, 27, 34, 35, 38, 57 |
| <i>ABCB1</i> | rs1055302  | No         | NA  | 29                             |
| <i>ABCB1</i> | rs10808071 | No         | NA  | 22                             |
| <i>ABCB1</i> | rs1128503  | No         | No  | 20, 21, 22, 27, 34, 38         |
| <i>ABCB1</i> | rs1202171  | No         | NA  | 22, 29                         |
| <i>ABCB1</i> | rs1202172  | No         | NA  | 29                             |
| <i>ABCB1</i> | rs1202179  | No         | NA  | 21, 29                         |
| <i>ABCB1</i> | rs12535512 | No         | NA  | 29                             |
| <i>ABCB1</i> | rs13226726 | No         | NA  | 29                             |
| <i>ABCB1</i> | rs13229143 | No         | NA  | 29                             |
| <i>ABCB1</i> | rs13233308 | No         | NA  | 22, 29                         |
| <i>ABCB1</i> | rs17327624 | No         | NA  | 29                             |
| <i>ABCB1</i> | rs1922240  | No         | NA  | 29                             |
| <i>ABCB1</i> | rs2032582  | No         | Yes | 21, 57                         |
| <i>ABCB1</i> | rs2214102  | No         | NA  | 29                             |
| <i>ABCB1</i> | rs2235013  | No         | NA  | 21, 29                         |
| <i>ABCB1</i> | rs2235035  | No         | NA  | 22                             |
| <i>ABCB1</i> | rs2235046  | No         | NA  | 29                             |
| <i>ABCB1</i> | rs2235048  | No         | NA  | 22, 29                         |
| <i>ABCB1</i> | rs2520464  | No         | NA  | 29                             |
| <i>ABCB1</i> | rs3789243  | No         | NA  | 22, 29                         |
| <i>ABCB1</i> | rs3842     | No         | NA  | 29                             |
| <i>ABCB1</i> | rs4148733  | No         | NA  | 29                             |
| <i>ABCB1</i> | rs4148734  | No         | NA  | 29                             |
| <i>ABCB1</i> | rs4148737  | No         | NA  | 22                             |
| <i>ABCB1</i> | rs4148738  | No         | NA  | 29                             |
| <i>ABCB1</i> | rs4148743  | No         | NA  | 29                             |
| <i>ABCB1</i> | rs6946119  | No         | NA  | 29                             |
| <i>ABCB1</i> | rs6961419  | No         | NA  | 29                             |
| <i>ABCB1</i> | rs6961649  | No         | NA  | 22                             |
| <i>ABCB1</i> | rs6961665  | No         | NA  | 22                             |
| <i>ABCB1</i> | rs6979885  | No         | NA  | 29                             |
| <i>ABCB1</i> | rs7789645  | No         | NA  | 29                             |
| <i>ABCB1</i> | rs9282564  | <b>Yes</b> | Yes | 20, 21                         |
| <i>ABCC1</i> | rs11075291 | No         | NA  | 22                             |
| <i>ABCC1</i> | rs12922588 | No         | NA  | 20                             |
| <i>ABCC1</i> | rs2074087  | No         | NA  | 27                             |
| <i>ABCC1</i> | rs215060   | No         | NA  | 20                             |
| <i>ABCC1</i> | rs2230671  | No         | No  | 27, 29                         |
| <i>ABCC1</i> | rs246219   | No         | NA  | 20, 22                         |
| <i>ABCC1</i> | rs246221   | No         | NA  | 20, 29                         |

|               |            |            |           |                                                            |
|---------------|------------|------------|-----------|------------------------------------------------------------|
| <i>ABCC1</i>  | rs246240   | No         | NA        | 29                                                         |
| <i>ABCC1</i>  | rs35592    | No         | NA        | 22, 29                                                     |
| <i>ABCC1</i>  | rs3784862  | No         | NA        | 22, 27, 29                                                 |
| <i>ABCC1</i>  | rs4148330  | No         | NA        | 20, 29                                                     |
| <i>ABCC1</i>  | rs4148358  | No         | NA        | 20                                                         |
| <i>ABCC10</i> | rs1214748  | No         | NA        | 20                                                         |
| <i>ABCC10</i> | rs1214752  | No         | NA        | 20                                                         |
| <i>ABCC10</i> | rs831314   | No         | NA        | 20                                                         |
| <i>ABCC2</i>  | rs12826    | No         | Yes*   No | 28, 29*                                                    |
| <i>ABCC2</i>  | rs17222723 | No         | NA        | 36                                                         |
| <i>ABCC2</i>  | rs1885301  | No         | NA        | 36                                                         |
| <i>ABCC2</i>  | rs2002042  | No         | NA        | 22                                                         |
| <i>ABCC2</i>  | rs2273697  | No         | No        | 20, 22, 27, 30, 35, 36                                     |
| <i>ABCC2</i>  | rs2756109  | No         | NA        | 22                                                         |
| <i>ABCC2</i>  | rs2804402  | No         | NA        | 36                                                         |
| <i>ABCC2</i>  | rs3740063  | No         | NA        | 22                                                         |
| <i>ABCC2</i>  | rs3740065  | <b>Yes</b> | Yes*   No | 22, 28, 29*, 30*, 31*                                      |
| <i>ABCC2</i>  | rs3740066  | <b>Yes</b> | Yes*   No | 20, 27*, 29*                                               |
| <i>ABCC2</i>  | rs3740074  | No         | NA        | 22                                                         |
| <i>ABCC2</i>  | rs4148398  | No         | NA        | 22                                                         |
| <i>ABCC2</i>  | rs717620   | <b>Yes</b> | Yes*   No | 20, 22, 23, 27, 28, 29,<br>30*, 31*, 32, 33, 34, 35,<br>36 |
| <i>ABCC2</i>  | rs7910642  | No         | NA        | 36                                                         |
| <i>ABCC2</i>  | rs8187710  | No         | NA        | 36                                                         |
| <i>ABCC3</i>  | rs10153257 | No         | NA        | 29                                                         |
| <i>ABCC3</i>  | rs1051640  | No         | NA        | 29                                                         |
| <i>ABCC3</i>  | rs11568591 | No         | NA        | 36                                                         |
| <i>ABCC3</i>  | rs12051822 | No         | NA        | 29                                                         |
| <i>ABCC3</i>  | rs12602161 | No         | NA        | 20, 29                                                     |
| <i>ABCC3</i>  | rs12604031 | No         | NA        | 29                                                         |
| <i>ABCC3</i>  | rs1541392  | No         | NA        | 29                                                         |
| <i>ABCC3</i>  | rs1558288  | No         | NA        | 29                                                         |
| <i>ABCC3</i>  | rs17562467 | No         | NA        | 29                                                         |
| <i>ABCC3</i>  | rs17562516 | No         | NA        | 29                                                         |
| <i>ABCC3</i>  | rs17563146 | No         | NA        | 29                                                         |
| <i>ABCC3</i>  | rs1978153  | No         | NA        | 29                                                         |
| <i>ABCC3</i>  | rs1989983  | No         | NA        | 36                                                         |
| <i>ABCC3</i>  | rs2072365  | No         | NA        | 29                                                         |
| <i>ABCC3</i>  | rs2107441  | No         | NA        | 20                                                         |
| <i>ABCC3</i>  | rs2189595  | No         | NA        | 29                                                         |
| <i>ABCC3</i>  | rs2277624  | No         | NA        | 29                                                         |

|       |            |            |           |             |
|-------|------------|------------|-----------|-------------|
| ABCC3 | rs2412332  | No         | NA        | 29          |
| ABCC3 | rs2412333  | No         | NA        | 20, 29      |
| ABCC3 | rs3785911  | No         | NA        | 29          |
| ABCC3 | rs3785912  | No         | NA        | 29          |
| ABCC3 | rs4148411  | No         | NA        | 29          |
| ABCC3 | rs4148412  | No         | NA        | 29          |
| ABCC3 | rs4148413  | No         | NA        | 29          |
| ABCC3 | rs4148416  | No         | NA        | 22          |
| ABCC3 | rs4148418  | No         | NA        | 29          |
| ABCC3 | rs4793665  | <b>Yes</b> | No        | 20, 36      |
| ABCC3 | rs4793666  | No         | NA        | 29          |
| ABCC3 | rs7212045  | No         | NA        | 29          |
| ABCC3 | rs733392   | No         | NA        | 20, 29      |
| ABCC3 | rs739921   | No         | NA        | 29          |
| ABCC3 | rs739923   | No         | NA        | 29          |
| ABCC3 | rs757421   | No         | NA        | 29          |
| ABCC3 | rs8073706  | No         | NA        | 29          |
| ABCC3 | rs8075406  | No         | NA        | 29          |
| ABCC3 | rs8196     | No         | NA        | 29          |
| ABCC3 | rs879459   | No         | NA        | 29          |
| ABCC3 | rs9895420  | <b>Yes</b> | No        | 36          |
| ABCC4 | rs10219913 | <b>Yes</b> | Yes       | 28, 29      |
| ABCC4 | rs11568658 | No         | NA        | 37          |
| ABCC4 | rs1678392  | No         | No        | 28, 29      |
| ABCC4 | rs1764419  | No         | NA        | 37          |
| ABCC4 | rs2274407  | No         | Yes       | 27, 31, 37  |
| ABCC4 | rs2619312  | No         | No        | 28, 29      |
| ABCC4 | rs2993579  | No         | NA        | 37          |
| ABCC4 | rs3742106  | No         | NA        | 29, 37      |
| ABCC4 | rs3751333  | No         | NA        | 37          |
| ABCC4 | rs7317112  | <b>Yes</b> | Yes       | 28, 29      |
| ABCC4 | rs868853   | <b>Yes</b> | No        | 29, 31, 37  |
| ABCC4 | rs869951   | No         | NA        | 37          |
| ABCC4 | rs9302061  | No         | No        | 28, 29      |
| ABCC4 | rs9516519  | <b>Yes</b> | Yes*   No | 28*, 29, 31 |
| ABCC5 | rs1520195  | No         | NA        | 36          |
| ABCC5 | rs562      | No         | NA        | 36          |
| ABCC5 | rs7627754  | No         | NA        | 36          |
| ABCG2 | rs12505410 | <b>Yes</b> | No        | 22          |
| ABCG2 | rs13120400 | <b>Yes</b> | Yes       | 22          |
| ABCG2 | rs13137622 | <b>Yes</b> | No        | 22          |

|               |            |            |     |                                                                          |
|---------------|------------|------------|-----|--------------------------------------------------------------------------|
| <i>ABCG2</i>  | rs1564481  | No         | NA  | 22                                                                       |
| <i>ABCG2</i>  | rs17731538 | No         | NA  | 22                                                                       |
| <i>ABCG2</i>  | rs2231137  | No         | Yes | 31, 38                                                                   |
| <i>ABCG2</i>  | rs2231142  | <b>Yes</b> | Yes | 20, 23, 24, 25, 26, 27                                                   |
| <i>ABCG2</i>  | rs2622604  | No         | NA  | 22                                                                       |
| <i>ABCG2</i>  | rs2622621  | No         | Yes | 22, 29                                                                   |
| <i>ABCG2</i>  | rs2725252  | No         | No  | 22, 29                                                                   |
| <i>ABCG2</i>  | rs3114018  | No         | NA  | 22                                                                       |
| <i>ABCG2</i>  | rs6857600  | No         | NA  | 22                                                                       |
| <i>ARID5B</i> | rs10821936 | No         | NA  | 21                                                                       |
| <i>ARID5B</i> | rs4506592  | No         | NA  | 21                                                                       |
| <i>ARID5B</i> | rs4509706  | No         | NA  | 21                                                                       |
| <i>ARID5B</i> | rs4948487  | No         | NA  | 21                                                                       |
| <i>ARID5B</i> | rs4948496  | <b>Yes</b> | Yes | 21, 32                                                                   |
| <i>ARID5B</i> | rs4948502  | No         | NA  | 21                                                                       |
| <i>ARID5B</i> | rs7089424  | No         | NA  | 21                                                                       |
| <i>ATIC</i>   | rs2372536  | No         | NA  | 45                                                                       |
| <i>DHFR</i>   | rs1105525  | No         | NA  | 27                                                                       |
| <i>DHFR</i>   | rs1643641  | No         | NA  | 43                                                                       |
| <i>DHFR</i>   | rs1650695  | No         | NA  | 43                                                                       |
| <i>DHFR</i>   | rs1650696  | No         | NA  | 43                                                                       |
| <i>DHFR</i>   | rs1650697  | No         | NA  | 27                                                                       |
| <i>DHFR</i>   | rs408626   | No         | NA  | 43                                                                       |
| <i>DHFR</i>   | rs442767   | No         | NA  | 43                                                                       |
| <i>DHFR</i>   | rs70991108 | No         | NA  | 75                                                                       |
| <i>DHFR</i>   | rs7387     | No         | NA  | 27                                                                       |
| <i>FPGS</i>   | rs10106    | No         | NA  | 21                                                                       |
| <i>FPGS</i>   | rs1544105  | <b>Yes</b> | No  | 21, 44, 69, 70                                                           |
| <i>FPGS</i>   | rs4451422  | No         | NA  | 21                                                                       |
| <i>GGH</i>    | rs11545076 | No         | -   | 68                                                                       |
| <i>GGH</i>    | rs11545077 | No         | Yes | 68                                                                       |
| <i>GGH</i>    | rs11545078 | No         | Yes | 68                                                                       |
| <i>GGH</i>    | rs1800909  | No         | Yes | 68                                                                       |
| <i>GGH</i>    | rs3758149  | <b>Yes</b> | Yes | 20, 44, 68                                                               |
| <i>MTHFD1</i> | rs1076991  | No         | NA  | 21                                                                       |
| <i>MTHFD1</i> | rs1950902  | No         | NA  | 21                                                                       |
| <i>MTHFD1</i> | rs2236225  | <b>Yes</b> | No  | 21, 35, 71                                                               |
| <i>MTHFD1</i> | rs745686   | No         | NA  | 21                                                                       |
| <i>MTHFR</i>  | rs1801131  | No         | Yes | 23, 25, 26, 27, 28, 33, 34,<br>45, 46, 52, 57, 71, 72, 75,<br>76, 79, 80 |



|                |            |            |           |                                                                                                                 |
|----------------|------------|------------|-----------|-----------------------------------------------------------------------------------------------------------------|
| <i>MTHFR</i>   | rs1801133  | <b>Yes</b> | Yes   No* | 23, 25, 26, 27, 28, 32, 33, 34, 35, 39, 42*, 43, 44, 45, 46, 47, 52, 57, 71, 72, 73, 74, 75, 76, 77, 78, 79, 80 |
| <i>MTR</i>     | rs10925257 | No         | NA        | 21                                                                                                              |
| <i>MTR</i>     | rs12759827 | No         | NA        | 21                                                                                                              |
| <i>MTR</i>     | rs1805087  | No         | -         | 21, 35, 57                                                                                                      |
| <i>MTR</i>     | rs2853523  | No         | NA        | 21                                                                                                              |
| <i>MTR</i>     | rs3768142  | No         | NA        | 21                                                                                                              |
| <i>MTR</i>     | rs4659724  | No         | NA        | 21                                                                                                              |
| <i>MTRR</i>    | rs10380    | No         | NA        | 21                                                                                                              |
| <i>MTRR</i>    | rs1532268  | No         | NA        | 21                                                                                                              |
| <i>MTRR</i>    | rs162036   | No         | NA        | 21                                                                                                              |
| <i>MTRR</i>    | rs1801394  | <b>Yes</b> | No        | 21, 28, 35, 57                                                                                                  |
| <i>MTRR</i>    | rs2966952  | No         | NA        | 21                                                                                                              |
| <i>MTRR</i>    | rs326120   | No         | NA        | 21                                                                                                              |
| <i>MTRR</i>    | rs3776455  | No         | NA        | 21                                                                                                              |
| <i>SLC19A1</i> | rs1051266  | <b>Yes</b> | Yes*   No | 20, 21, 22, 26*, 27, 28, 29*, 33, 34, 35, 38, 39, 40*, 41*, 42*, 43*                                            |
| <i>SLC19A1</i> | rs1051296  | <b>Yes</b> | Yes       | 67                                                                                                              |
| <i>SLC19A1</i> | rs1131596  | No         | Yes       | 29, 38                                                                                                          |
| <i>SLC19A1</i> | rs2838958  | No         | No        | 38                                                                                                              |
| <i>SLC19A1</i> | rs3788200  | No         | Yes       | 29, 38                                                                                                          |
| <i>SLC19A1</i> | rs4819128  | No         | NA        | 21                                                                                                              |
| <i>SLC19A1</i> | rs61510559 | <b>Yes</b> | No        | 23, 25, 45, 46, 47                                                                                              |
| <i>SLC19A1</i> | rs7499     | No         | NA        | 21                                                                                                              |
| <i>SLC22A6</i> | rs10897310 | No         | No        | 29                                                                                                              |
| <i>SLC22A6</i> | rs11231294 | No         | No        | 29                                                                                                              |
| <i>SLC22A6</i> | rs3017670  | No         | NA        | 29                                                                                                              |
| <i>SLC22A6</i> | rs4149172  | No         | No        | 29                                                                                                              |
| <i>SLC22A6</i> | rs6591722  | No         | NA        | 29                                                                                                              |
| <i>SLC22A8</i> | rs10792367 | No         | NA        | 29                                                                                                              |
| <i>SLC22A8</i> | rs10897315 | No         | NA        | 29                                                                                                              |
| <i>SLC22A8</i> | rs2187383  | No         | NA        | 29                                                                                                              |
| <i>SLC22A8</i> | rs2276299  | No         | NA        | 21, 29                                                                                                          |
| <i>SLC22A8</i> | rs3809069  | No         | NA        | 21, 29                                                                                                          |
| <i>SLC22A8</i> | rs3948869  | No         | NA        | 29                                                                                                              |
| <i>SLC22A8</i> | rs4149182  | No         | NA        | 29                                                                                                              |
| <i>SLC22A8</i> | rs4149183  | No         | NA        | 21                                                                                                              |
| <i>SLC22A8</i> | rs4963228  | No         | NA        | 29                                                                                                              |

|         |            |     |           |             |
|---------|------------|-----|-----------|-------------|
| SLC22A8 | rs4963326  | No  | NA        | 29          |
| SLC22A8 | rs948980   | No  | NA        | 29          |
| SLCO1A2 | rs10505872 | No  | NA        | 29          |
| SLCO1A2 | rs10743413 | No  | NA        | 29          |
| SLCO1A2 | rs10770804 | No  | NA        | 29          |
| SLCO1A2 | rs10770805 | No  | NA        | 29          |
| SLCO1A2 | rs10841795 | No  | NA        | 29          |
| SLCO1A2 | rs10841803 | No  | NA        | 29          |
| SLCO1A2 | rs11045918 | No  | NA        | 29          |
| SLCO1A2 | rs11045919 | No  | NA        | 29          |
| SLCO1A2 | rs11045953 | No  | NA        | 29          |
| SLCO1A2 | rs11045961 | No  | NA        | 29          |
| SLCO1A2 | rs11045994 | No  | NA        | 29          |
| SLCO1A2 | rs11831407 | No  | NA        | 29          |
| SLCO1A2 | rs11837182 | No  | NA        | 29          |
| SLCO1A2 | rs12300594 | No  | NA        | 29          |
| SLCO1A2 | rs12319824 | No  | NA        | 29          |
| SLCO1A2 | rs16923597 | No  | NA        | 29          |
| SLCO1A2 | rs16923647 | No  | NA        | 29          |
| SLCO1A2 | rs2045938  | No  | NA        | 29          |
| SLCO1A2 | rs2045939  | No  | NA        | 29          |
| SLCO1A2 | rs2045940  | No  | NA        | 29          |
| SLCO1A2 | rs2306231  | No  | NA        | 29          |
| SLCO1A2 | rs2417977  | No  | NA        | 29          |
| SLCO1A2 | rs4148984  | No  | NA        | 29          |
| SLCO1A2 | rs4148988  | No  | NA        | 29          |
| SLCO1A2 | rs4149008  | No  | NA        | 29          |
| SLCO1A2 | rs4149009  | Yes | No        | 27, 29, 48  |
| SLCO1A2 | rs4337089  | No  | NA        | 29          |
| SLCO1A2 | rs4762699  | No  | NA        | 29          |
| SLCO1A2 | rs4762818  | No  | NA        | 29          |
| SLCO1A2 | rs6487215  | No  | NA        | 29          |
| SLCO1A2 | rs7137767  | No  | NA        | 29          |
| SLCO1A2 | rs7301895  | No  | NA        | 29          |
| SLCO1A2 | rs7954757  | No  | NA        | 29          |
| SLCO1A2 | rs7962263  | No  | NA        | 29          |
| SLCO1A2 | rs7964783  | No  | NA        | 29          |
| SLCO1B1 | rs10444413 | No  | NA        | 22          |
| SLCO1B1 | rs10841753 | Yes | Yes*   No | 38, 49*, 50 |
| SLCO1B1 | rs10841769 | No  | NA        | 21          |
| SLCO1B1 | rs11045787 | Yes | Yes       | 49          |

|         |            |     |           |                                                                |
|---------|------------|-----|-----------|----------------------------------------------------------------|
| SLCO1B1 | rs11045813 | Yes | Yes       | 50                                                             |
| SLCO1B1 | rs11045818 | Yes | Yes*   No | 21, 49*, 50*                                                   |
| SLCO1B1 | rs11045819 | Yes | No        | 51, 21                                                         |
| SLCO1B1 | rs11045821 | Yes | No        | 50                                                             |
| SLCO1B1 | rs11045823 | No  | NA        | 21                                                             |
| SLCO1B1 | rs11045825 | Yes | No        | 50                                                             |
| SLCO1B1 | rs11045870 | Yes | No        | 50                                                             |
| SLCO1B1 | rs11045872 | Yes | No        | 22, 49, 50                                                     |
| SLCO1B1 | rs11045879 | Yes | Yes*   No | 22, 25*, 29, 33, 35*, 49, 50*, 52                              |
| SLCO1B1 | rs11045892 | Yes | No        | 50                                                             |
| SLCO1B1 | rs11045897 | Yes | Yes       | 38, 53                                                         |
| SLCO1B1 | rs1463565  | No  | NA        | 22                                                             |
| SLCO1B1 | rs16923647 | Yes | No        | 50                                                             |
| SLCO1B1 | rs17328763 | Yes | Yes       | 49                                                             |
| SLCO1B1 | rs2169969  | Yes | No        | 50                                                             |
| SLCO1B1 | rs2306283  | Yes | Yes*   No | 27*, 33, 38, 54                                                |
| SLCO1B1 | rs2417955  | No  | NA        | 22                                                             |
| SLCO1B1 | rs2900476  | Yes | No        | 22, 49                                                         |
| SLCO1B1 | rs34671512 | Yes | No        | 51                                                             |
| SLCO1B1 | rs4149026  | No  | NA        | 22                                                             |
| SLCO1B1 | rs4149034  | No  | NA        | 22                                                             |
| SLCO1B1 | rs4149035  | No  | No        | 22, 29                                                         |
| SLCO1B1 | rs4149056  | Yes | Yes       | 21, 22, 27, 28, 32, 33, 34, 35, 38, 43, 49, 50, 51, 52, 54, 55 |
| SLCO1B1 | rs4149057  | No  | NA        | 22                                                             |
| SLCO1B1 | rs4149076  | Yes | No        | 49                                                             |
| SLCO1B1 | rs4149081  | Yes | Yes*   No | 22*, 25*, 49, 50*, 53*                                         |
| SLCO1B1 | rs4363657  | No  | NA        | 21                                                             |
| SLCO1B1 | rs59502379 | Yes | Yes       | 51                                                             |
| SLCO1B1 | rs7966613  | No  | Yes       | 49                                                             |
| SLCO1B3 | rs1002441  | No  | NA        | 29                                                             |
| SLCO1B3 | rs1017385  | No  | NA        | 29                                                             |
| SLCO1B3 | rs10841648 | No  | NA        | 29                                                             |
| SLCO1B3 | rs10841660 | No  | NA        | 29                                                             |
| SLCO1B3 | rs10841661 | No  | NA        | 29                                                             |
| SLCO1B3 | rs10841697 | No  | NA        | 29                                                             |
| SLCO1B3 | rs11045512 | No  | NA        | 29                                                             |
| SLCO1B3 | rs11045573 | No  | NA        | 29                                                             |
| SLCO1B3 | rs11045585 | No  | NA        | 29                                                             |
| SLCO1B3 | rs11045598 | No  | NA        | 29                                                             |

|                |             |            |    |                                |
|----------------|-------------|------------|----|--------------------------------|
| <i>SLCO1B3</i> | rs12824715  | No         | NA | 29                             |
| <i>SLCO1B3</i> | rs1304608   | No         | NA | 29                             |
| <i>SLCO1B3</i> | rs1549968   | No         | NA | 29                             |
| <i>SLCO1B3</i> | rs1581194   | No         | NA | 29                             |
| <i>SLCO1B3</i> | rs1966648   | No         | NA | 29                             |
| <i>SLCO1B3</i> | rs2117032   | No         | NA | 29                             |
| <i>SLCO1B3</i> | rs2417886   | No         | NA | 29                             |
| <i>SLCO1B3</i> | rs2417940   | No         | NA | 29                             |
| <i>SLCO1B3</i> | rs4149117   | No         | NA | 29                             |
| <i>SLCO1B3</i> | rs4149121   | No         | NA | 29                             |
| <i>SLCO1B3</i> | rs4149132   | No         | NA | 29                             |
| <i>SLCO1B3</i> | rs4382961   | No         | NA | 29                             |
| <i>SLCO1B3</i> | rs4762803   | No         | NA | 29                             |
| <i>SLCO1B3</i> | rs7311358   | No         | NA | 29                             |
| <i>SLCO1B3</i> | rs7962265   | No         | NA | 29                             |
| <i>SLCO1B3</i> | rs7973653   | No         | NA | 29                             |
| <i>SLCO1B3</i> | rs975657    | No         | NA | 29                             |
| <i>TYMS</i>    | rs1004474   | No         | NA | 21                             |
| <i>TYMS</i>    | rs151264360 | No         | NA | 75                             |
| <i>TYMS</i>    | rs2612100   | No         | NA | 21                             |
| <i>TYMS</i>    | rs2790      | <b>Yes</b> | No | 48                             |
| <i>TYMS</i>    | rs2853533   | No         | NA | 21                             |
| <i>TYMS</i>    | rs2853741   | No         | NA | 21                             |
| <i>TYMS</i>    | rs34489327  | <b>Yes</b> | No | 25, 34, 43                     |
| <i>TYMS</i>    | rs34743033  | <b>Yes</b> | No | 25, 33, 34, 42, 43, 46, 57, 71 |
| <i>TYMS</i>    | rs9967368   | No         | NA | 21                             |

\* Indicates the studies that showed increased MTX exposure when there were conflicting reports for a variant

NA; Not applicable. The study genotyped for the variant, but did not present any pharmacokinetic data.

- Pharmacokinetic data was presented. No observable nor statistical differences between the genotypes
